# Supplementary material for: A unique dual sensor for the detection of DCNP (nerve agent mimic) and Cd2+ in water
Source: Royal Society of Chemistry journal article supplement (doi:10.1039/c9nj03327k), 2019-01-01
Supplement: c9nj03327k1.pdf [file c9nj03327k1.pdf]

## **SUPPORTING INFORMATION**

# **A unique dual sensor for the detection of DCNP (nerve agent mimic) and Cd<sup>2+</sup> in water**

**Ayndrila Ghosh,<sup>†</sup> Sujoy Das,<sup>†</sup> Saurodeep Mandal and Prithidipa Sahoo\***

<sup>†</sup>Equal contribution to the work.

Department of Chemistry, Siksha Bhavana (Institute of Science), Visva-Bharati, Santiniketan, 731235, W.B.,  
India.

**Table S1. Performance Comparison of Existing Methods and Present Methods based on chemosensors for Determination of DCNP (a Tabun mimic).**

| Analytes                          | Sensor type                                        | Detecti<br>on<br>limit(n<br>M)        | Detecti<br>on<br>mediu<br>m | Detectio<br>n<br>method         | Detection<br>state    | Sensitivit<br>y &<br>Selectivit<br>y | Respon<br>se Time    | Estimation<br>in samples | Reference                                     |
|-----------------------------------|----------------------------------------------------|---------------------------------------|-----------------------------|---------------------------------|-----------------------|--------------------------------------|----------------------|--------------------------|-----------------------------------------------|
| <b>DCNP<br/>(Tabun<br/>mimic)</b> | <b>Carbazole</b>                                   | <b>7.75</b>                           | <b>Neutra<br/>l</b>         | <b>Naked<br/>eye<br/>UV-Vis</b> | <b>Liquid<br/>Gas</b> | <b>High</b>                          | <b>Real<br/>time</b> | <b>Water</b>             | <b>Current<br/>method</b>                     |
| Tabun                             | Trifluorome<br>thylphenyl                          | 0.05-<br>1.0 mg                       | nd                          | Naked<br>eye<br>UV-Vis          | Liquid                | High                                 | Real<br>time         | nd                       | Analyst. 2011,<br>136, 5151-<br>5156.         |
| DCNP,<br>DCP                      | N,N-<br>dimethylanil<br>ine                        | nd                                    | Neutral                     | Naked<br>eye<br>UV-Vis          | Liquid                | High                                 | Few<br>minute<br>s   | nd                       | Chem. Eur. J.<br>2011, 17, 6931-<br>6934      |
| DMMPD<br>CP<br>DCNP               | Zn(II)-bis-<br>terpyridine<br>systems              | 1-10                                  | nd                          | Fluoresc<br>ence                | Liquid,<br>Gas        | High                                 | 10 min               | nd                       | Chem.<br>Commun.,<br>2012, 48, 964-<br>966.   |
| DECP<br>(DCNP)                    | BODIPY-<br>salicylaldehy<br>deoxime<br>conjugation | 922                                   | Neutral                     | Fluoresc<br>ence                | Liquid                | High                                 | nd                   | nd                       | Chem.<br>Commun.,<br>2014, 50, 7531-<br>7534. |
| DCNP                              | BODIPY                                             | 1-10                                  | Neutral                     | Fluoresc<br>ence                | Liquid                | Moderate                             | 45-90<br>min         | nd                       | Chem.<br>Commun.,<br>2012, 48,<br>4767–4769.  |
| DCNP<br>DFP                       | Aryl<br>carbinol                                   | $5 \times 10^2$ -<br>$16 \times 10^2$ | nd                          | Naked<br>eye,<br>UV-vis         | Liquid                | Moderate                             | 5 min                | nd                       | New J. Chem.,<br>2012, 36,<br>1485–1489       |
| DCP,<br>DCNP,<br>DFP              | BODIPY                                             | nd                                    | nd                          | Fluoresc<br>ence                | Liquid,<br>Gas        | Moderate                             | 10-20<br>second<br>s | nd                       | Chem. Eur. J.<br>2016, 22, 1 – 6              |

|           |                                        |     |         |                   |             |      |            |    |                                       |
|-----------|----------------------------------------|-----|---------|-------------------|-------------|------|------------|----|---------------------------------------|
| DCNP, DFP | Tert-butyl dimethylsilyl ether (TBDMS) | 200 | Neutral | Naked eye, UV-vis | Liquid, Gas | High | 30 seconds | nd | Chem. Eur. J. 2011, 17, 11994 – 11997 |
| DCNP, DFP | Tryarylmethanol                        | 300 | Neutral | Naked eye, UV-vis | Liquid, Gas | High | 5-10 min   | nd | Eur. J. Org. Chem. 2012, 4937–4946    |

## 1. NMR Studies:

### <sup>1</sup>H NMR of CPC in DMSO-d<sub>6</sub>:

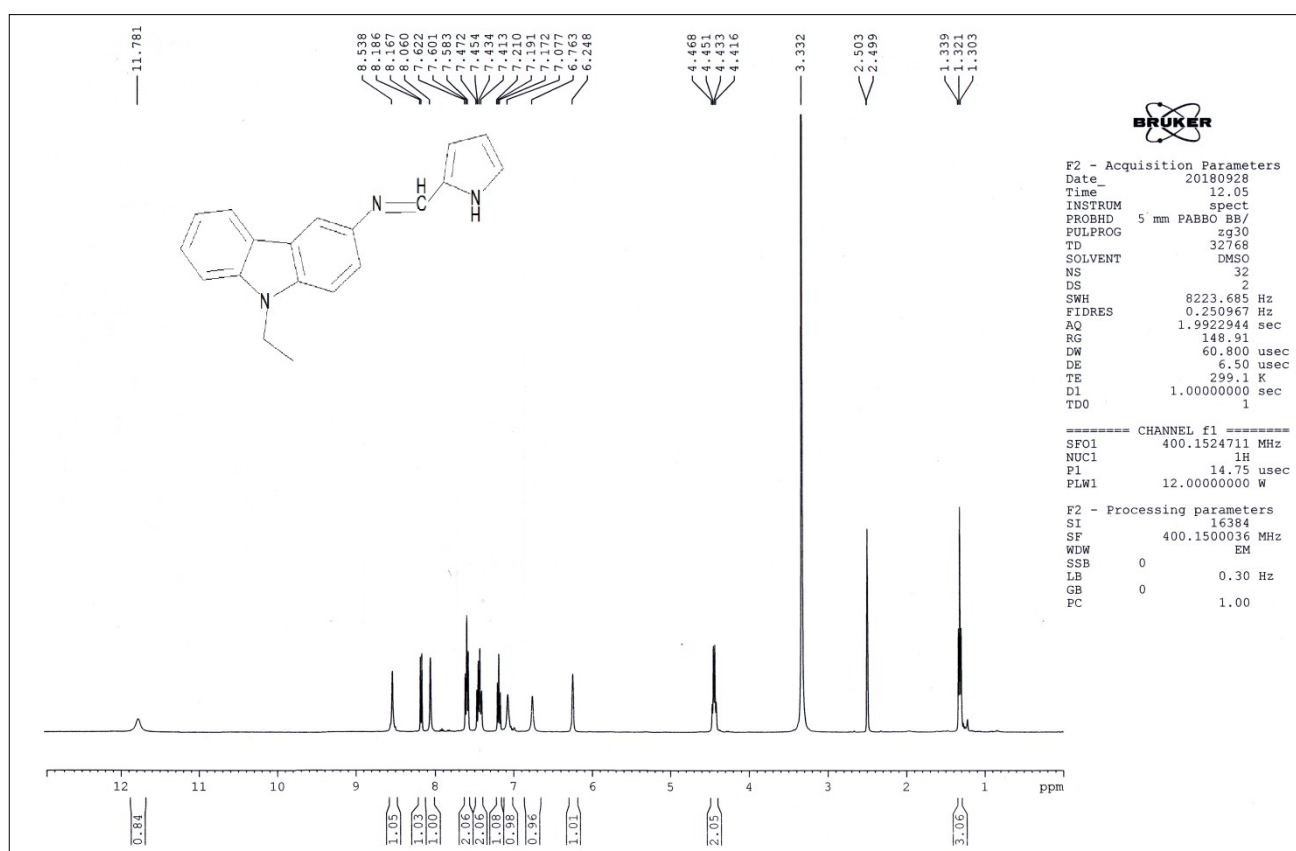

**Figure S1.** <sup>1</sup>H NMR of CPC in DMSO-d<sub>6</sub> (400 MHz).

# <sup>13</sup>C NMR of CPC in DMSO-d<sub>6</sub>:

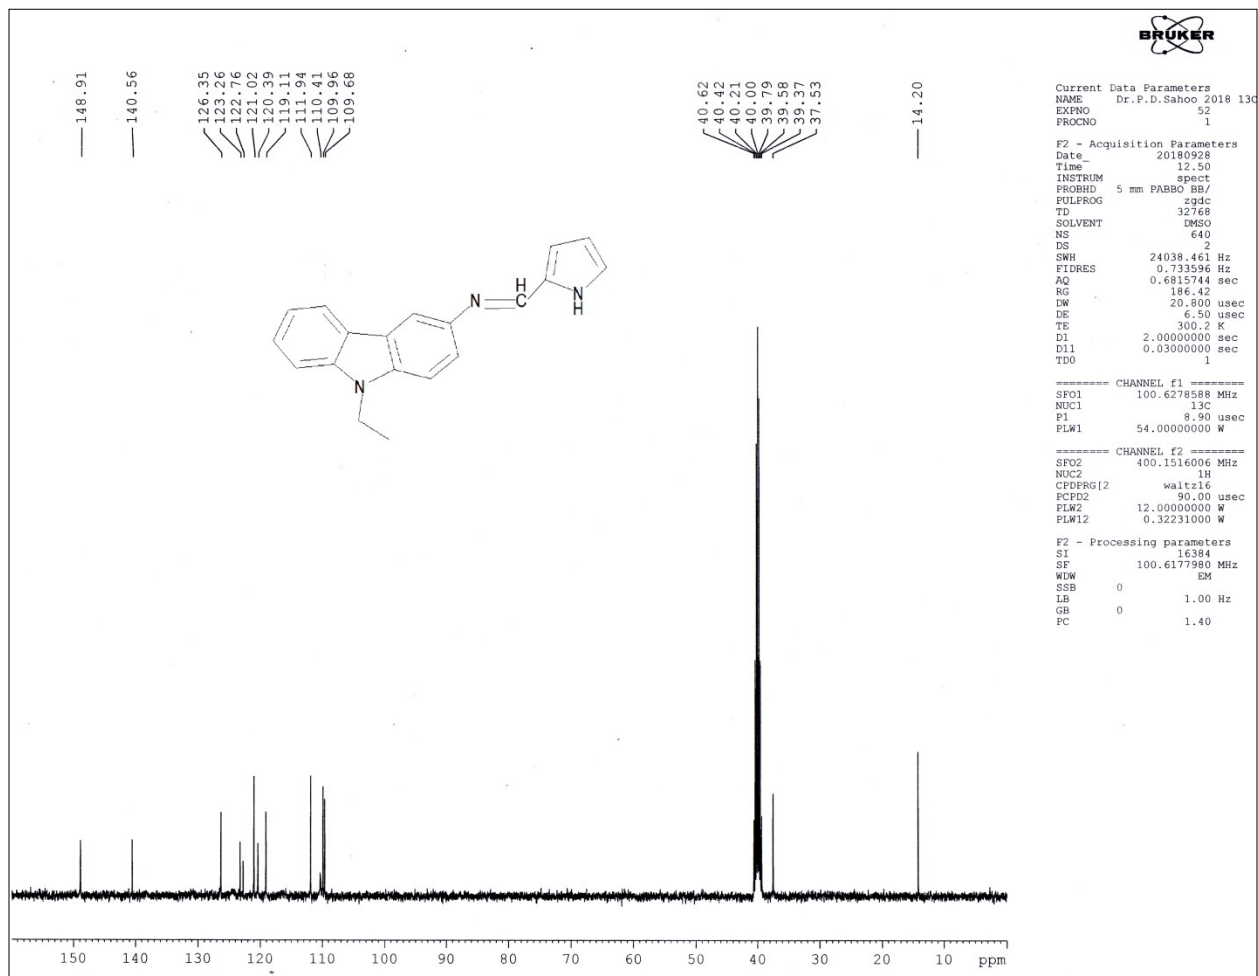

Figure S2. <sup>13</sup>C NMR of CPC in DMSO-d<sub>6</sub> (400 MHz).

## 2. Mass spectrum of CPC:

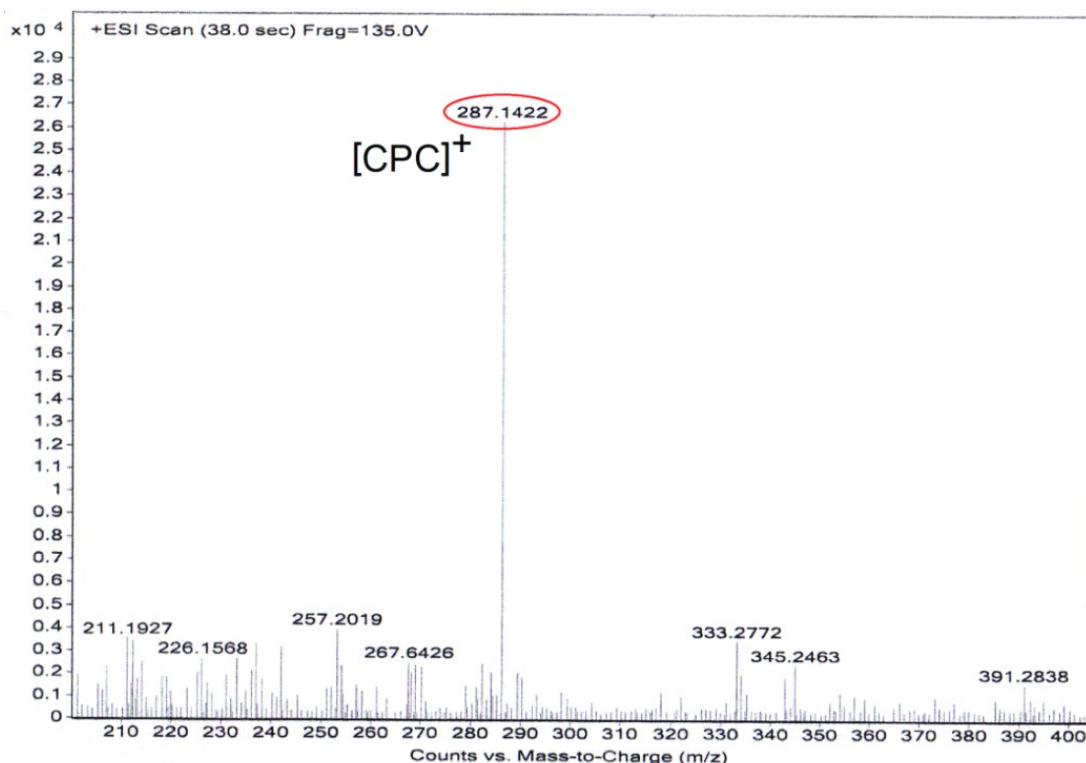

Figure S3. MALDI-TOF MS of CPC.

## 3. UV-vis spectral studies.

A stock solution of **CPC** (20  $\mu\text{M}$ ) was prepared in the solvent acetonitrile.  $\text{Cd}^{2+}$  solution (from cadmium perchlorate salt) and DCNP solution of various concentrations were prepared in buffered aqueous medium (pH 7.0, 10 mM phosphate buffer). During the titration of **CPC** with DCNP, each time a 20  $\mu\text{M}$  solution of **CPC** was filled in a quartz optical cell of 1 cm optical path length and DCNP stock solution was added into the quartz optical cell gradually by using a micropipette. The very same method was acquired at the time of titration between **CPC** and  $\text{Cd}^{2+}$ . Spectral data were recorded at 2-3 min after the addition of  $\text{Cd}^{2+}$  or DCNP.

## 4. Evaluation of the Association constants for the formation of CPC-1 by UV-Vis method:

The substrate binding interaction was calculated according to the Benesi-Hildebrand equation.

$$\frac{A_0}{A - A_0} = \left( \frac{\epsilon_0}{\epsilon_0 - \epsilon} \right)^2 \left( \frac{1}{K_B [\text{Substrate}]} + 1 \right)$$

Here  $A_0$  is the absorbance of receptor in the absence of guest,  $A$  is the absorbance recorded in the presence of added guest,  $\epsilon_0$  and  $\epsilon$  are the corresponding molar absorption co-efficient and  $K_B$  represents the substrate binding interaction with guest. The association constant ( $K_a$ ) of was determined from the equation:

$K_a = \text{intercept/slope}$ . From the linear fit graph we get,  $K_a = 44.9 \times 10^5 \text{ M}^{-1}$  for **DCNP**.

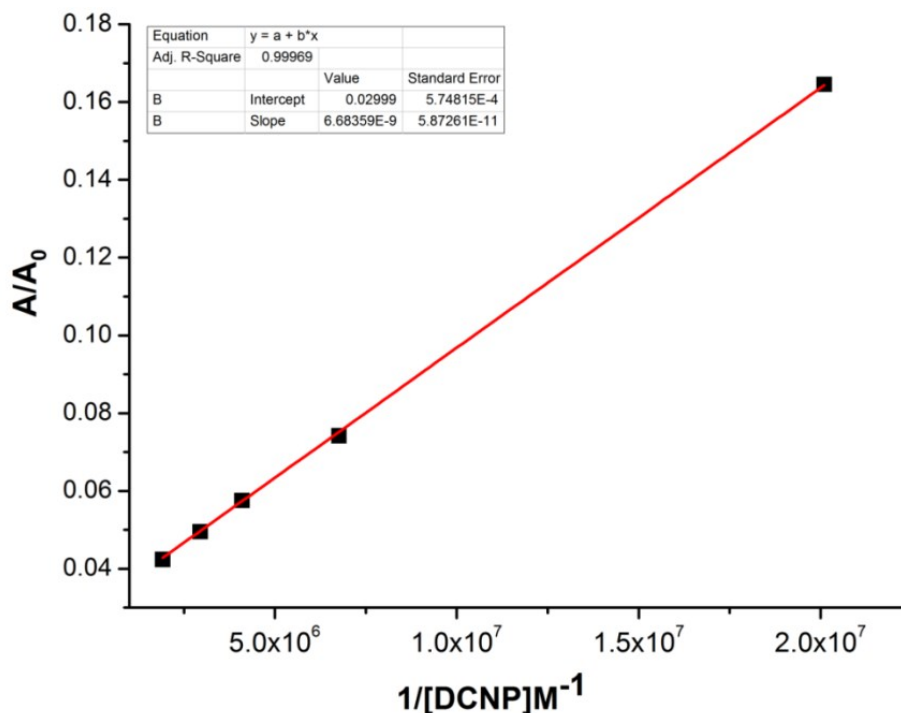

**Figure S4.** Linear regression analysis ( $1/[G]$  vs  $A/A_0$ ) for the calculation of association constant values of DCNP by UV- titration method.

### 5. Calculation of limit of detection (LOD) of CPC with DCNP:

The limit of detection (LOD) of CPC for sensing DCNP was determined from the following equation:

$$\text{LOD} = K \times \text{SD}/S$$

Where  $K = 2$  or  $3$  (we take  $3$  in this case);  $\text{SD}$  is the standard deviation of the blank receptor solution;  $S$  is the slope of the calibration curve.

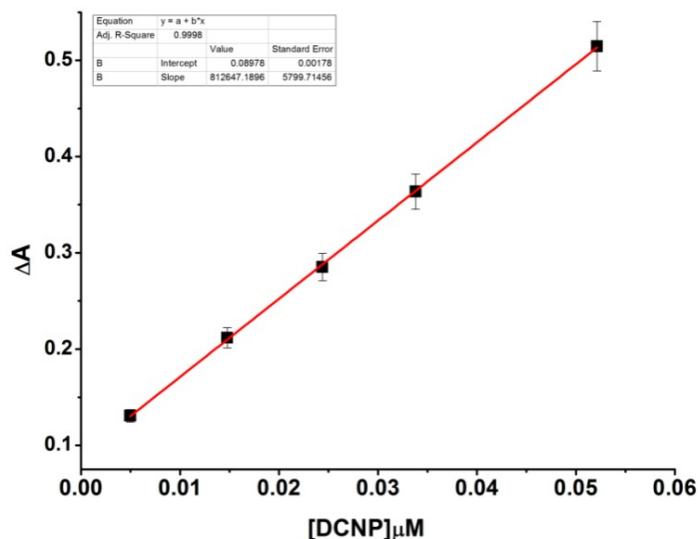

**Figure S5.** Linear fit curve of **CPC** with respect to **DCNP** concentration. Standard deviations are given by error bars where,  $n=3$ .

From the linear fit graph of **DCNP** (a), we get slope =  $8.12 \times 10^5$ , and SD value is 0.0021. Thus using the above formula we get the Limit of Detection =  $7.75 \times 10^{-9}$  M or 7.75 nM. Therefore, **CPC** can colorimetrically detect **DCNP** up to this very lower concentration.

### 6. Job's plot for determining the stoichiometry of binding by UV-Vis method:

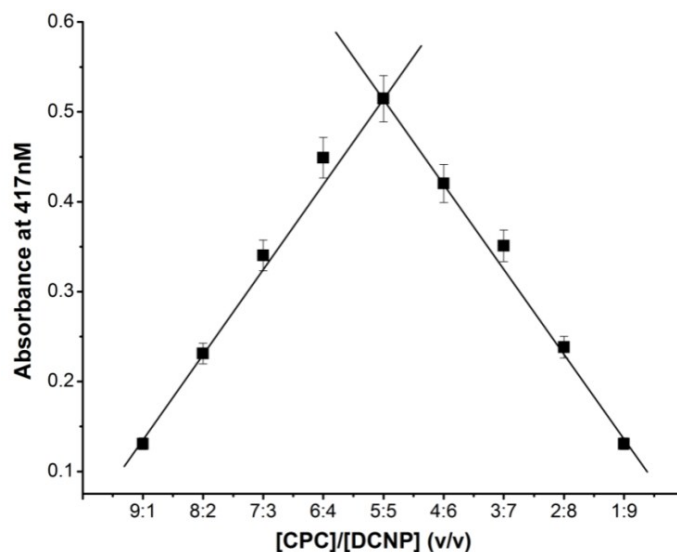

**Figure S6.** Job's plot of **CPC** with **DCNP** in acetonitrile-water (1:6, v/v), neutral pH, ( $[CPC] / [DCNP] = 1 \times 10^{-5}$  M) by UV-Vis method, which indicate 1:1 stoichiometry for **CPC** with **DCNP**. Standard deviations are given by error bars where,  $n=3$ .

## 7. pH titration of CPC and CPC-1 at varying pH concentrations:

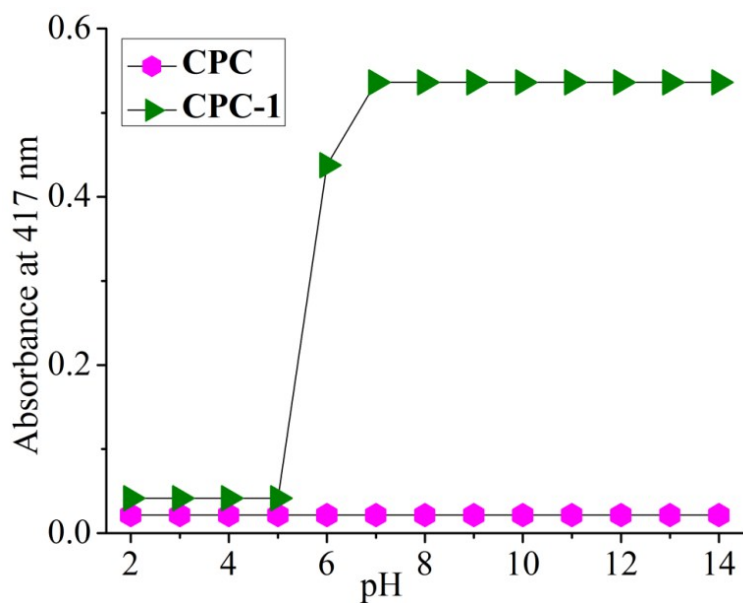

**Figure S7.** Dependence of the probe **CPC** and the product **CPC-1** on the pH of the solution.

## 8. Time dependent absorbance changes of CPC upon gradual addition of DCNP:

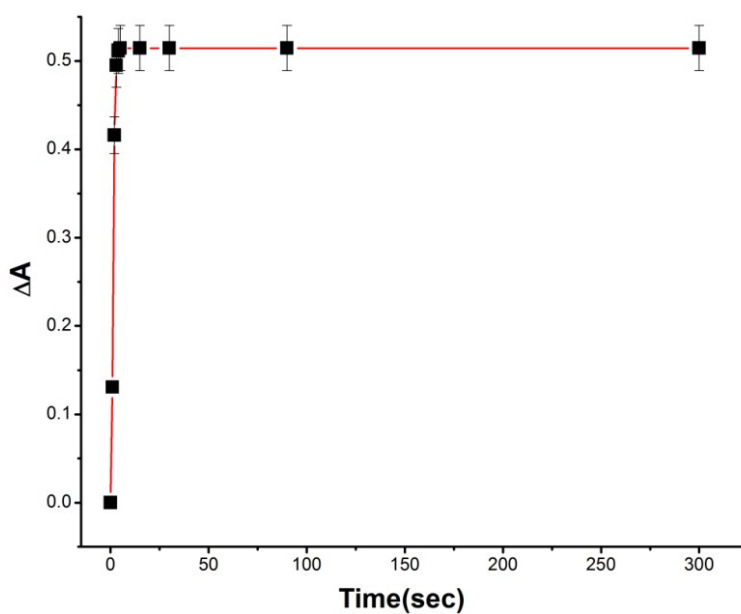

**Figure S8.** Absorbance intensity plot of **CPC-1** as a function of time in  $\text{CH}_3\text{CN}/\text{H}_2\text{O}$  (1:6 v/v, pH 7.0, 10 mM phosphate buffer). Standard deviations are given by error bars where,  $n=3$ .



## 9. Fluorescence spectral studies:

A stock solution of **CPC** (20  $\mu\text{M}$ ) was prepared in the solvent acetonitrile.  $\text{Cd}^{2+}$  solution (from cadmium perchlorate salt) and DCNP solution of various concentrations were prepared in buffered aqueous medium (pH 7.0, 10 mM phosphate buffer). During the titration of **CPC** with DCNP, each time a 20  $\mu\text{M}$  solution of **CPC** was filled in a quartz optical cell of 1 cm optical path length and DCNP stock solution was added into the quartz optical cell gradually by using a micropipette. Spectral data were recorded at 2-3 min after the addition of  $\text{Cd}^{2+}$ . For all fluorescence measurements, excitations were provided at 350 nm, and emissions were collected between 350 to 600 nm.

## 10. Evaluation of the Association constants for the formation of **CPC-Cd<sup>2+</sup>** by fluorescence method.

Binding constant of the **CPC-Cd<sup>2+</sup>** complex was calculated through emission method by using the following equation.

$$1/(I - I_0) = 1/K(I_{\text{max}} - I_0) [G] + 1/(I_{\text{max}} - I_0) \quad (3)$$

where  $I_0$ ,  $I_{\text{max}}$ , and  $I$  represent the emission intensity of **CPC**, the maximum emission intensity observed in the presence of added  $\text{Cd}^{2+}$  at 435 nm ( $\lambda_{\text{ex}} = 380$  nm), and the emission intensity at a certain concentration of the  $\text{Cd}^{2+}$  respectively.  $[G]$  is the concentration of the  $\text{Cd}^{2+}$  solution added. The association constant ( $K_a$ ) of was determined from the equation:

$K_a = \text{intercept/slope}$ . From the linear fit graph we get,  $K_a = 2.83 \times 10^4$  for  $\text{Cd}^{2+}$ .

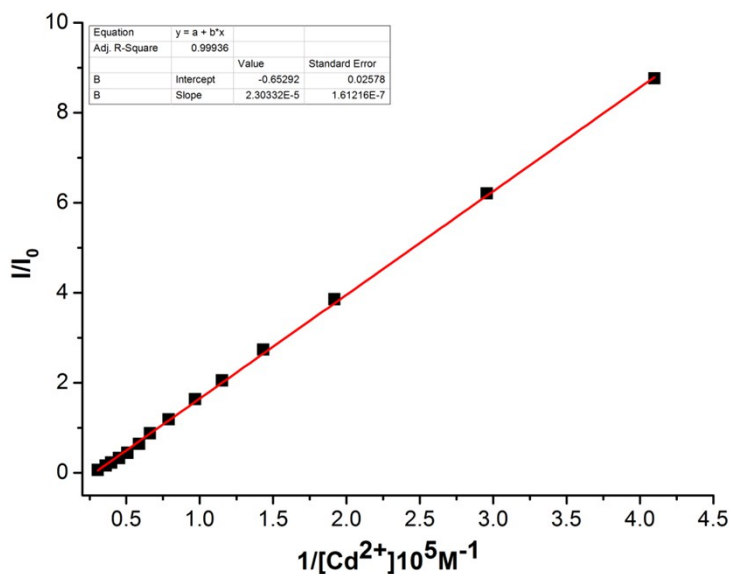

**Figure S9.** Linear regression analysis ( $1/[G]$  vs  $1/\Delta I$ ) for the calculation of association constant values of  $\text{Cd}^{2+}$  by Fluorescence titration method.

## 11. Calculation of limit of detection (LOD) of CPC with Cd<sup>2+</sup>:

The limit of detection (LOD) of CPC for sensing Cd<sup>2+</sup> was determined from the following equation:

$$\text{LOD} = K \times \text{SD}/S$$

Where K = 2 or 3 (we take 3 in this case); SD is the standard deviation of the blank receptor solution; S is the slope of the calibration curve.

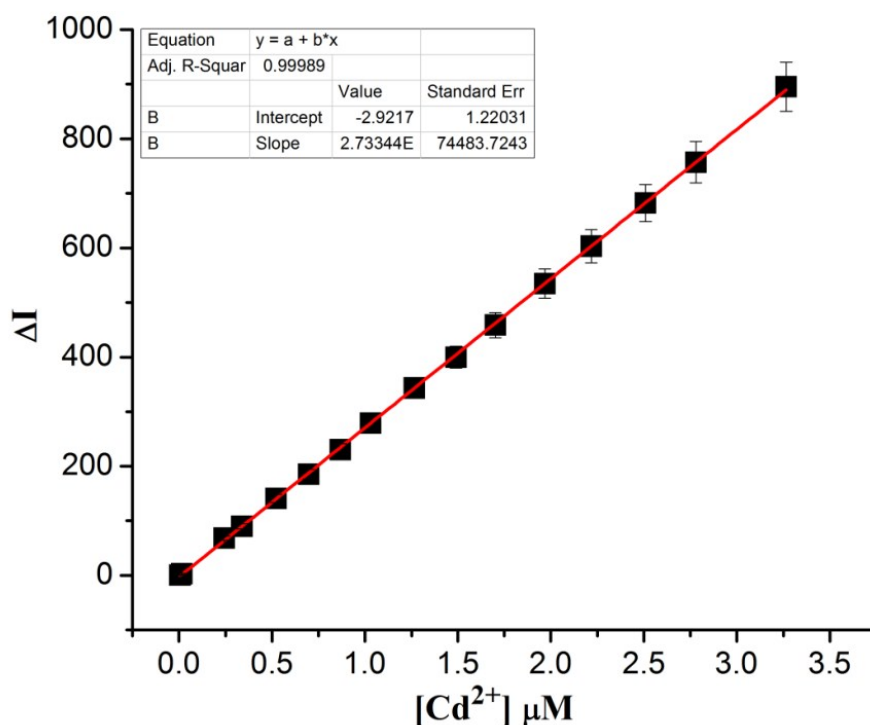

**Figure S10.** Linear fit curve of CPC with respect to Cd<sup>2+</sup> concentration.

From the linear fit graph of Cd<sup>2+</sup> we get slope =  $2.73 \times 10^7$  and SD value is 2.49. Thus using the above formula we get the Limit of Detection =  $0.27 \times 10^{-6}$  M or 0.27 µM. Therefore CPC can detect Cd<sup>2+</sup> up to this very lower concentration by fluorescence techniques. An average of three replicate measurements with standard deviation has been taken in each case.

## 12. Job's plot for determining the stoichiometry of binding by fluorescence method:

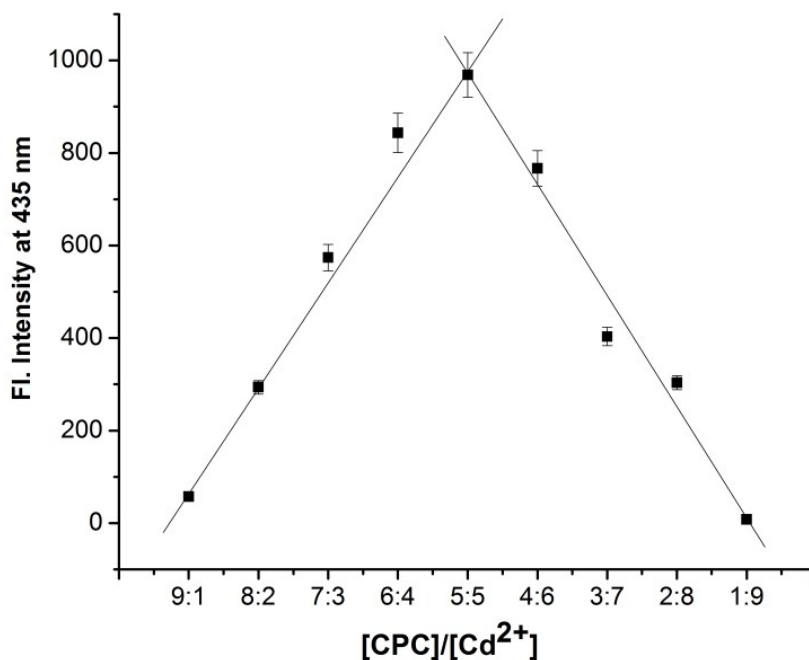

**Figure S11.** Job's plot of CPC with Cd<sup>2+</sup> in acetonitrile-water (1:6, v/v), ( $[CPC] / [Cd^{2+}] = 1 \times 10^{-5} M$ ) by fluorescence method, which indicate 1:1 stoichiometry for CPC with Cd<sup>2+</sup>. An average of three replicate measurements with standard deviation was taken for each value.

## 13. Time dependent fluorescence changes of CPC upon gradual addition of Cd<sup>2+</sup>:

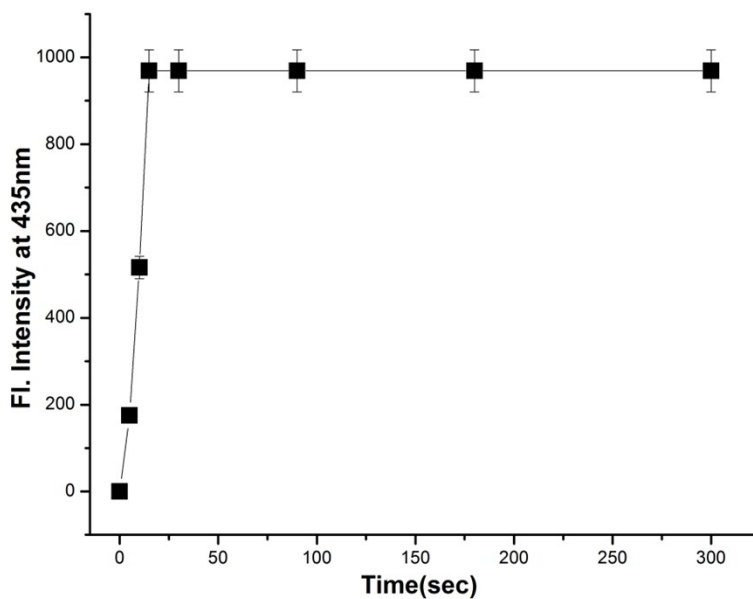

**Figure S12.** Fluorescence intensity plot of CPC-Cd<sup>2+</sup> complex as a function of time in CH<sub>3</sub>CN/H<sub>2</sub>O (1:6, v/v, pH 7.0, 10 mM phosphate buffer). An average of three replicate measurements with standard deviation was taken.

#### 14. pH dependence of probe CPC and CPC-Cd<sup>2+</sup> complex:

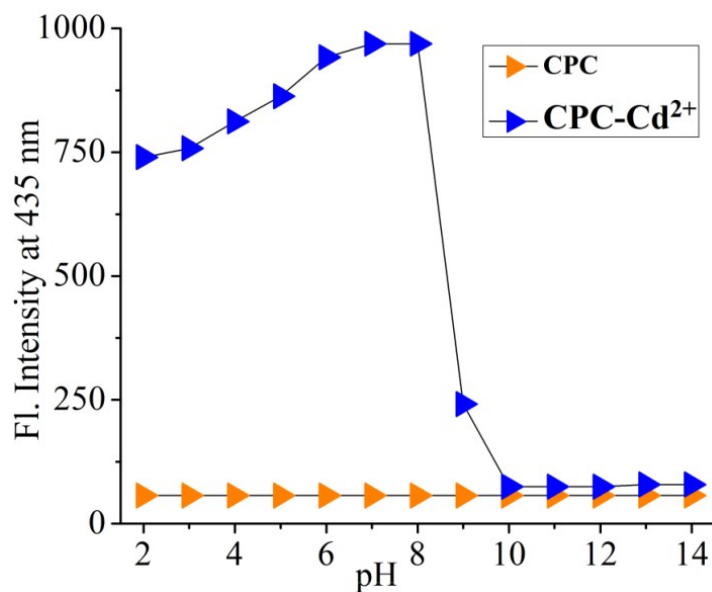

Figure S13. Dependence of the probe **CPC** and the complex **CPC-Cd<sup>2+</sup>** on the pH of the solution.

#### 15. HMQC spectra:

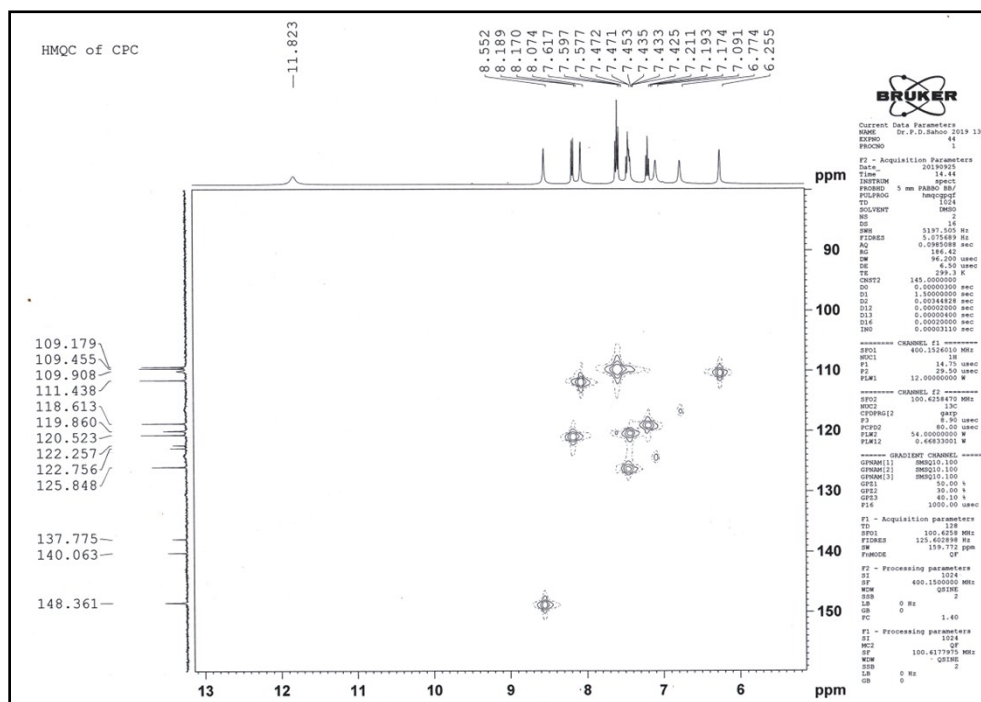

Figure S14. HMQC spectra [400 MHz] of CPC in DMSO-d<sub>6</sub> at 25°C.

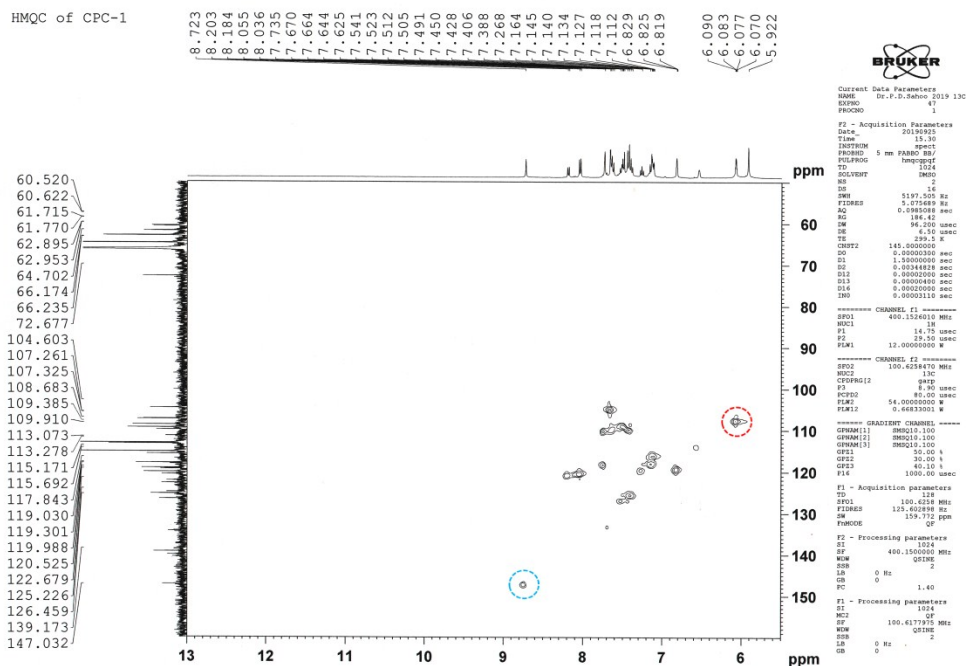

Figure S15. HMQC spectra [400 MHz] of CPC-1 in DMSO-d<sub>6</sub> at 25°C

## 16. Mass spectroscopic titrations:

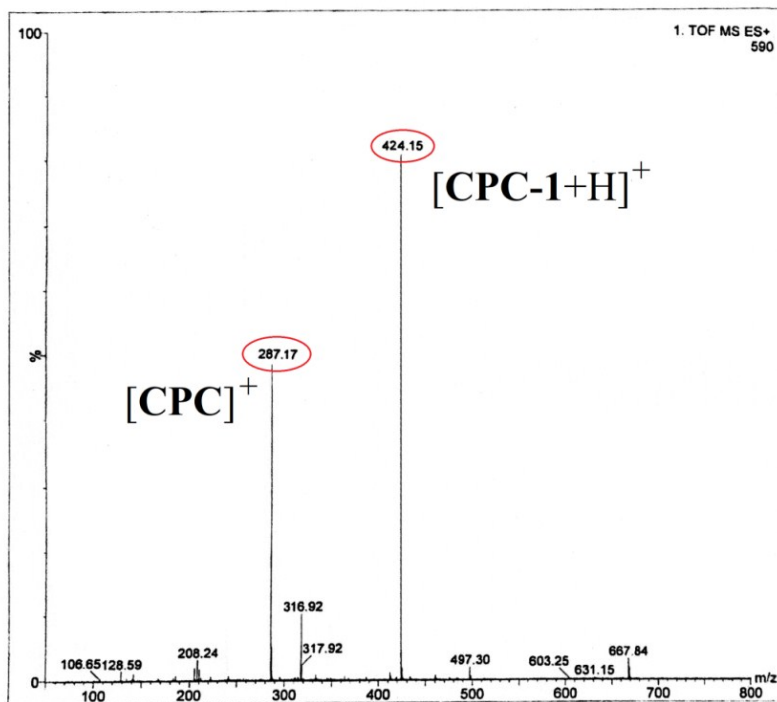

Figure S16. Partial HRMS spectra of the CPC-DCNP mixture taken after four hours of addition of DCNP to the CPC in acetonitrile.

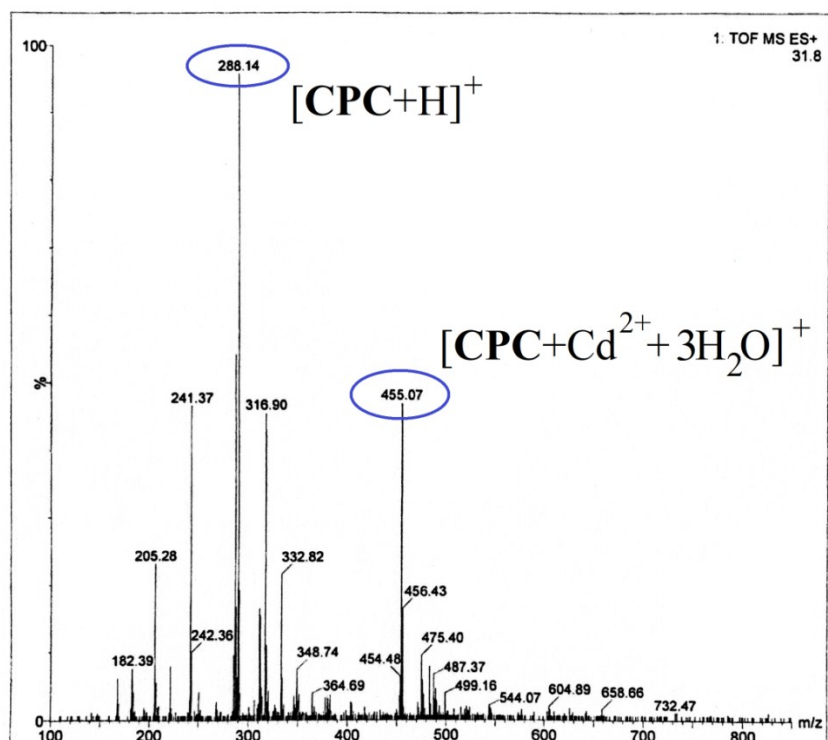

**Figure S17.** Partial HRMS spectra of the **CPC-Cd<sup>2+</sup>** mixture taken after two hours of addition of **Cd<sup>2+</sup>** to the **CPC** in acetonitrile.

### 17. Details of energy calculations using Density Functional Theory (DFT):

Top view of energy optimized geometry:

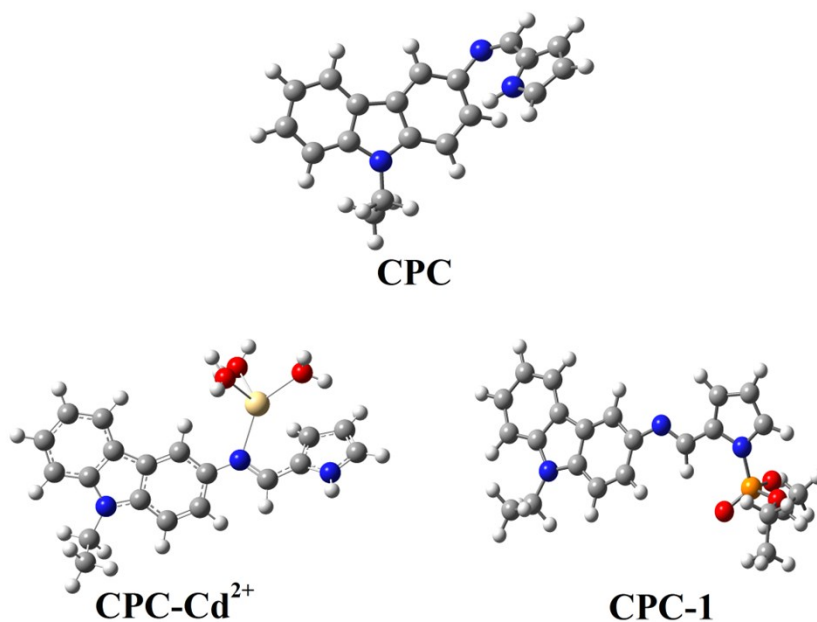

**Figure S18.** Energy optimized geometries of **CPC**, **CPC-1** and **CPC-Cd<sup>2+</sup>** complex obtained at the B3LYP/6-311G(d,p)/LANL2DZ levels of theory with CPCM solvation (H<sub>2</sub>O).

**Table S2.** Details of the geometry optimization in Gaussian 09 program.

| Details              | CPC- <i>cis</i> | CPC- <i>trans</i> | CPC-1     | CPC-Cd <sup>2+</sup> | DCNP     |
|----------------------|-----------------|-------------------|-----------|----------------------|----------|
| Calculation method   | RB3LYP          | RB3LYP            | RB3LYP    | RB3LYP               | RB3LYP   |
| Basis set            | 6-311G**        | 6-311G**          | 6-311G**  | 6-311G**             | 6-311G** |
| E(RB3LYP) (a.u.)     | -898.748        | -898.753          | -1623.834 | -1175.692            | -818.538 |
| Charge, Multiplicity | 0, 1            | 0, 1              | 0, 1      | 2, 1                 | 0, 1     |
| Solvent (CPCM)       | Water           | Water             | Water     | Water                | Water    |

**Table S3.** Selected electronic excitation energies (eV), oscillator strengths (f), main configurations of the low-lying excited states of all the molecules and complexes. The data were calculated by TDDFT//B3LYP/6-311G (d,p) based on the optimized ground state geometries.

| Molecules            | Electronic Transition           | Excitation Energy <sup>a</sup> | f <sup>b</sup> | Composition <sup>c</sup> (%)         |
|----------------------|---------------------------------|--------------------------------|----------------|--------------------------------------|
| CPC                  | S <sub>0</sub> → S <sub>1</sub> | 3.38 eV at 366.84 nm           | 0.8424         | H → L (69.33 %)                      |
|                      | S <sub>0</sub> → S <sub>4</sub> | 4.29 eV at 288.91 nm           | 0.4564         | H-1 → L+1 (55 %)                     |
| CPC-Cd <sup>2+</sup> | S <sub>0</sub> → S <sub>2</sub> | 3.07 eV at 403.61 nm           | 0.5608         | H → L+1 (64.5 %)<br>H-1 → L (26.5 %) |
|                      | S <sub>0</sub> → S <sub>8</sub> | 4.30 eV at 287.96 nm           | 0.1595         | H-2 → L+1 (53 %)<br>H-4 → L (42.4 %) |

|              |                       |                      |        |                              |
|--------------|-----------------------|----------------------|--------|------------------------------|
| <b>CPC-1</b> | $S_0 \rightarrow S_1$ | 3.21 eV at 390.12 nm | 0.8338 | H $\rightarrow$ L (69.7 %)   |
|              | $S_0 \rightarrow S_4$ | 4.23 eV at 292.84 nm | 0.3988 | H-3 $\rightarrow$ L (47.8 %) |

**Table S4.** Energies of the highest occupied molecular orbital (HOMO) and lowest unoccupied molecular orbital (LUMO).

| Species                    | $E_{\text{HOMO}}$<br>(a.u) | $E_{\text{LUMO}}$<br>(a.u) | $\Delta E$ (a.u) | $\Delta E$ (eV) | $\Delta E$ (kcal/mol) |
|----------------------------|----------------------------|----------------------------|------------------|-----------------|-----------------------|
| <b>CPC</b>                 | -0.19666                   | -0.05505                   | 0.14161          | 3.85            | 88.86                 |
| <b>CPC-Cd<sup>2+</sup></b> | -0.2053                    | -0.07384                   | 0.13146          | 3.57            | 82.38                 |
| <b>CPC-1</b>               | -0.19915                   | -0.06495                   | 0.1342           | 3.65            | 84.20                 |

### 18. Proposed Mechanism for the formation of CPC-1:

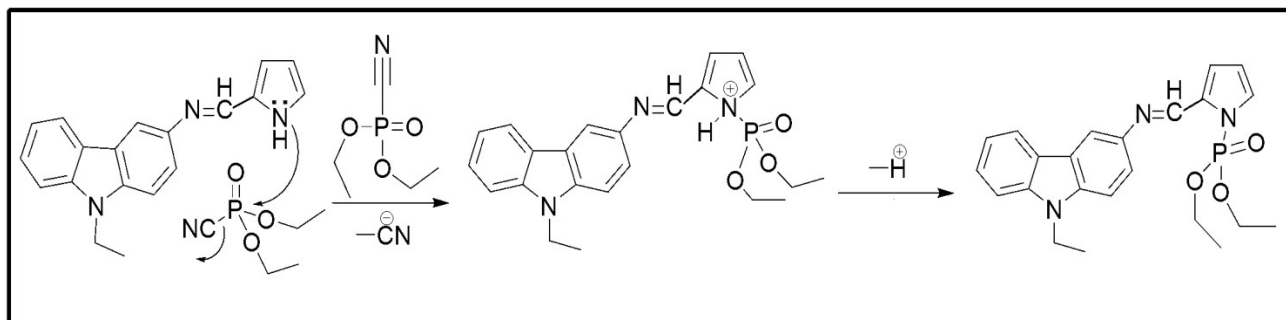

**Scheme S1.** Proposed mechanism for the formation of **CPC-1** from **CPC** upon addition of 1 equivalent of DCNP.



## 19. Quantification of DCNP in water samples by UV-Vis method:

Concentration vs. absorbance intensity graph for quantification of DCNP in pond and sea water samples:

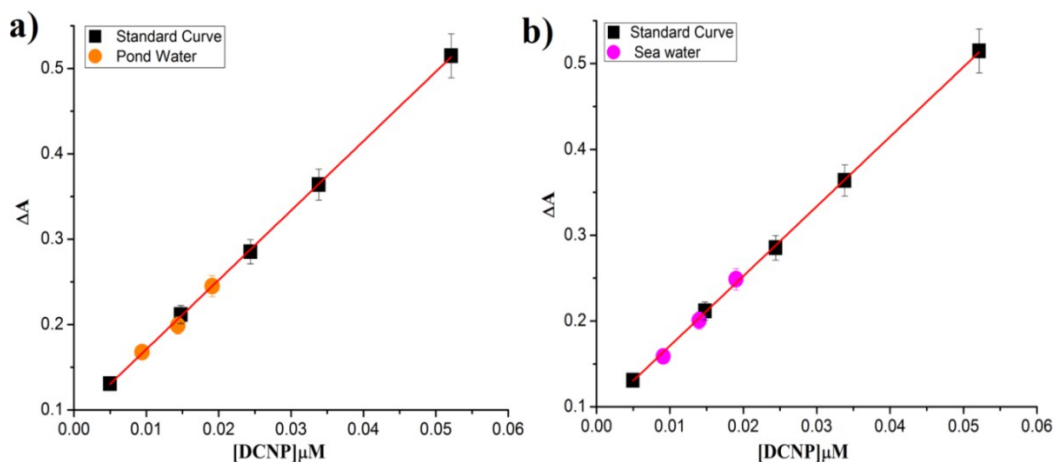

**Figure S19.** (a) Estimation of concentration of DCNP added in pond water samples following the standard curve. (b) Estimation of concentration of DCNP added in sea water samples following the standard curve. Standard deviations are given by error bars where,  $n=3$ .

## 20. Quantification of $Cd^{2+}$ in water samples by fluorescence method:

Concentration vs. fluorescence intensity graph for quantification of  $Cd^{2+}$  in pond and sea water samples:

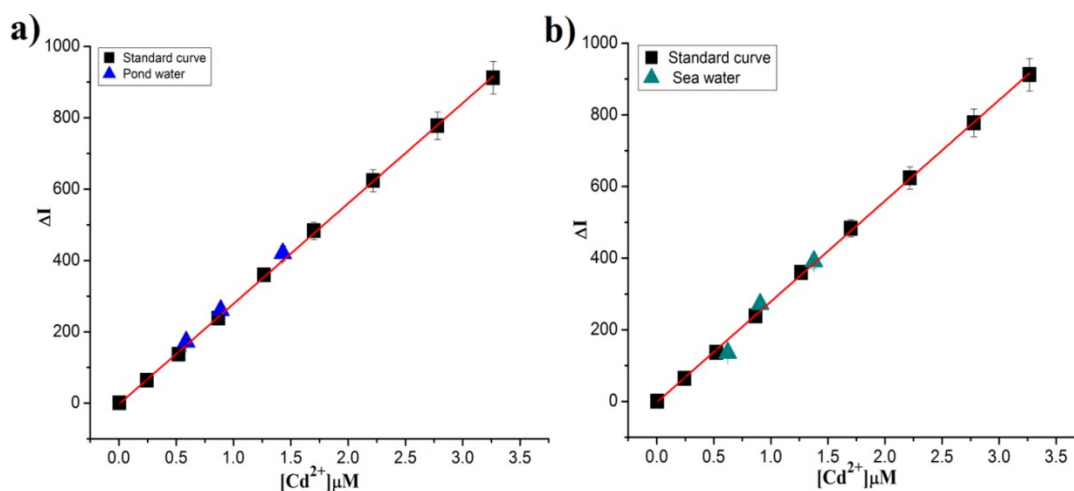

**Figure S20.** (a) Estimation of concentration of  $Cd^{2+}$  added in pond water samples following the standard curve. (b) Estimation of concentration of  $Cd^{2+}$  added in sea water samples following the standard curve. Standard deviations are given by error bars where,  $n=3$ .
